# Supplementary material
Source: PubMed Central journal article supplement (PMC5602892)
Supplement: supp_fj.201700187R_Supplemental_Figure2.pdf [file supp_fj.201700187R_Supplemental_Figure2.pdf]

### Mouse Strains Included In GWAS

| SNP ID<br>Chromosome<br>& Position | Primary Analysis | Kavanagh Lab Strains<br>Only | Gordon Lab Strains<br>Only | In model Inter-Lab<br>Adjustment | Kavanagh only Without<br>PW Strains | In model Inter-Lab<br>Adjustment Without<br>PW Strains | Linear regression Inter-<br>lab Adjustment<br>Without PW Strains | Linear regression Inter-<br>lab Adjustment<br>Without WSB | Linear regression Inter-<br>lab Adjustment With<br>No Wild Strains | Linear regression Inter-<br>lab Adjustment<br>Without C57B/10J |
|------------------------------------|------------------|------------------------------|----------------------------|----------------------------------|-------------------------------------|--------------------------------------------------------|------------------------------------------------------------------|-----------------------------------------------------------|--------------------------------------------------------------------|----------------------------------------------------------------|
| rs29865915<br>18_64292584          |                  |                              |                            |                                  |                                     |                                                        |                                                                  |                                                           |                                                                    |                                                                |
| rs29959933<br>18_64837330          |                  |                              |                            |                                  |                                     |                                                        |                                                                  |                                                           |                                                                    |                                                                |
| rs31581766<br>15_95827212          |                  |                              |                            |                                  |                                     |                                                        |                                                                  |                                                           |                                                                    |                                                                |
| rs29778747<br>18_64837532          |                  |                              |                            |                                  |                                     |                                                        |                                                                  |                                                           |                                                                    |                                                                |
| rs27482013<br>4_117407198          |                  |                              |                            |                                  |                                     |                                                        |                                                                  |                                                           |                                                                    |                                                                |
| rs3688273<br>15_96200660           |                  |                              |                            |                                  |                                     |                                                        |                                                                  |                                                           |                                                                    |                                                                |

Figure 2S. SNPs that were among the top 6 in terms of  $-\log(p)$  from different GWA studies performed using the initial and alternate analysis strategies. SNPs from alternate analyses shown where they appear more than once.
