# Supplementary material
Source: PubMed Central journal article supplement (PMC5602892)
Supplement: supp_fj.201700187R_Supplemental_Figure3.pdf [file supp_fj.201700187R_Supplemental_Figure3.pdf]

**% Neutrophils in BALF by Strain and rs29865915 Allele (Chr 18: near St8sia3 -log(p)=7.69)**

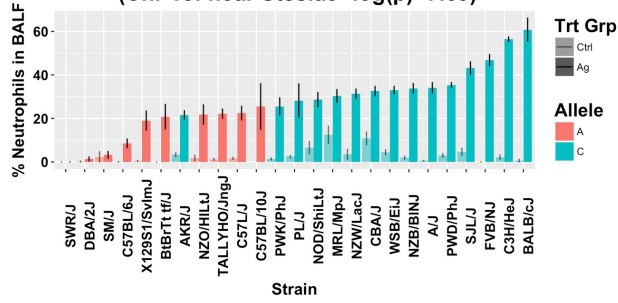

**% Neutrophils in BALF by Strain and rs29959933 Allele (Chr 18: near Nedd4l -log(p)=6.30)**

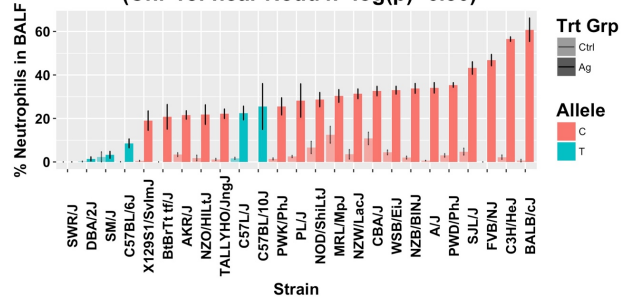

**% Neutrophils in BALF by Strain and rs31581766 Allele (Chr 15: in Ano6 -log(p)=5.44)**

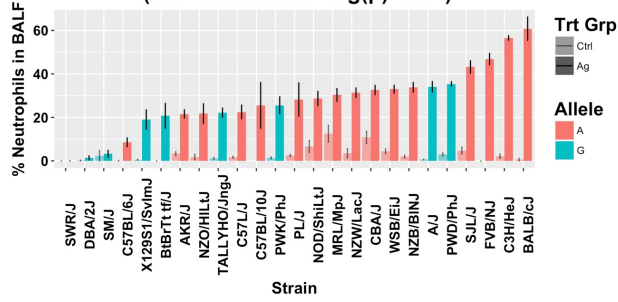

**% Neutrophils in BALF by Strain and rs29778747 Allele (Chr 18: near Nedd4l -log(p)=5.09)**

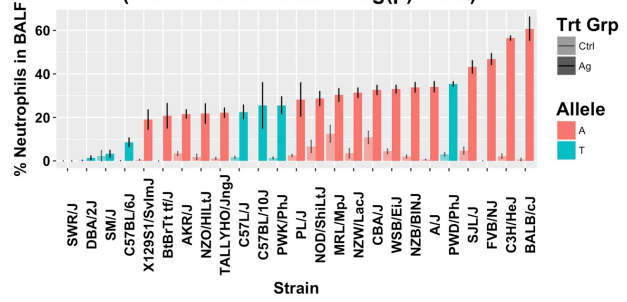

**% Neutrophils in BALF by Strain and rs27482013 Allele (Chr 4: in Rnf220 -log(p)=4.93)**

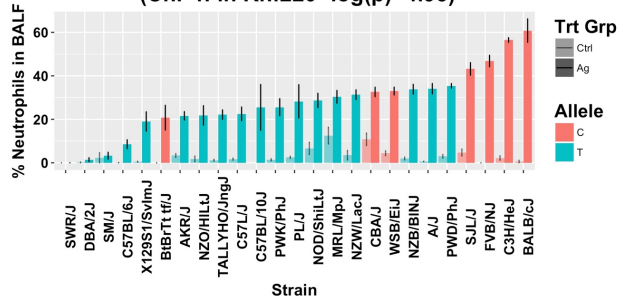

Figure 3S. Plot of % BALF neutrophils for the significant SNPs either in or near a candidate gene by strain, allele and treatment group illustrating allele distribution patterns.
